# Supplementary material for: Distinct immune and genomic signatures predict resistance to ibrutinib therapy in Waldenström macroglobulinemia
Source: Research Square preprint supplement (doi:10.21203/rs.3.rs-8594385/v1), 2026-01-23
Supplement: Supplementary file 1 [file 0f66d449c1e264b91151faf8.docx]

**Supplemental material**

**Distinct immune and genomic signatures predict resistance to ibrutinib therapy in Waldenström macroglobulinemia**

Tina Bagratuni1*, Christos Vlachos1*, Maria Sakkou1, Ioannis Kollias1, Ourania Theologi1, Nefeli Mavrianou-Koutsoukou1, Christine Liacos1, Konstantina Taouxi1, Alexandra Papadimou1, Katerina Chrisostomidou1, Agisilaos Papadopoulos1, Eleni Kalafati1, Foteini Theodorakakou1, Maria Gavriatopoulou1, Evangelos Terpos1, Zachary R. Hunter2, Steven Treon2, Meletios A. Dimopoulos1**, Efstathios Kastritis1**

**Tables**

**S. Table 1: Univariate analysis of PFS in RG and NRG patients**

| Univariate analysis | | |
| --- | --- | --- |
| Predictive variable | HR(95% CI) | P-value |
| Age | 1.02 (0.96, 1.09) | 0.5 |
| Sex (male) | 1.13(0.39, 3.25) | 0.8 |
| Baseline IgM < 4000 | 0.55 (0.19, 1.60) | 0.3 |
| Baseline Hemoglobin (>11.5) | 0.63 (0.43, 0.92) | 0.016 |
| Albumin < 3.5 | 3.36 (1.12, 10.1) | 0.03 |
| BMI <60 | 1.48 (0.51, 4.27) | 0.5 |

**S. Table 2: Patients characteristics**

|  | **Responder group (n=24)** | **Non-responder group (n=13)** |
| --- | --- | --- |
| **Sex (male/female)** | 10/14 | 7/6 |
| **Light chain class (Kappa/Lambda)** | 20/4 (83%/17%) | 8/5 (62%/38%) |
| **Age, median (range), y** | 71 (52-90) | 74 (50-88) |
| **BM infiltration, median (range), %** | 80 (5-90) | 80 (15-95) |
| **IgM levels, median (range), mg/dL** | 2770 (75-4870) | 3100 (497-7210) |
| **Hemoglobin, median (range), g/dL** | 10.6 (8-13.9) | 9.65 (7.4-12.4) |
| **Hemoglobin < 10 gr/dl** | 37,5% | 84% |
| **Platelet counts < 140 x109/L** | 4% | 15% |
| **Splenomegaly** | 12.5% | 30% |
| **Lymphadenopathy** | 8% | 7% |
| **B-symptoms** | 58% | 38% |
| **β2 Microglobulin, median (range), mg/L** | 2.79 (1.6-5.59) | 3.28(2.29-11.5) |
| ***MYD88L265P* mutation present** | 95% | 62% |
| ***CXCR4***  **mutation present*** | 29% | 46% |

*available in 35 patients

**S. Table 3: Patients characteristics of the validation set**

|  | **Progressor**  **group (n=12)** | **Non-progressor group (n=35)** |
| --- | --- | --- |
| **Sex (male/female)** | 8/4 | 24/11 |
| **Age, median (range), y** | 63 (42-83) | 66 (50-81) |
| **BM infiltration, median (range), %** | 60 (5-90) | 60 (5-95) |
| **IgM levels, median (range), mg/dL** | 3522 (1452-7450) | 3028 (104-7005) |
| **Splenomegaly** | 8.3% | 11% |
| **Adenopathy** | 41.6% | 25% |
| ***MYD88L265P* mutation present** | 100% | 100% |
| ***CXCR4***  **mutation present*** | 66% | 42% |

**S. Table 4:** **Elasticnet selected gene set**

| **Genes** | **Pathways involved** |
| --- | --- |
| *AREG* | MAPK, TNFα via NFκΒ |
| *ATF3* | TNFα via NFκΒ, AP-1 |
| *ATXN1* | AKT-1 |
| *BCL7A* | Cell cycle control |
| *CD1C* | Immune function |
| *CD80* | TNFα via NFκΒ |
| *CD86* | IL2/STAT |
| *CXCR3* | Immune function |
| *DUSP2* | MAPK, TNFα via NFκΒ |
| *EGR1* | TNFα via NFκΒ, AP-1 |
| *FLNB* | MAPK |
| *FOSB* | TNFα via NFκΒ, AP-1 |
| *HSPA1B* | MAPK |
| *HSPA6* | MAPK |
| *IRF4* | IL2/STAT |
| *KLF6* | TNFα via NFκΒ, IL2/STAT |
| *LMNA* | AKT-1 |
| *LTB* | IL2/STAT |
| *MECOM* | MAPK |
| *MYC* | MAPK, TNFα via NFκΒ, IL2/STAT, AP-1 |
| *NR4A1* | MAPK, TNFα via NFκΒ, AKT-1 |
| *PRKD1* | AKT-1 |
| *RGCC* | AKT1 |
| *RGS16* | IL2/STAT |
| *RHOB* | TNFα via NFκΒ |
| *SLC2A3* | TNFα via NFκΒ, IL2/STAT |
