# Supplementary material for: Distinct immune and genomic signatures predict resistance to ibrutinib therapy in Waldenström macroglobulinemia
Source: Research Square preprint supplement (doi:10.21203/rs.3.rs-8594385/v1), 2026-01-23
Supplement: Supplementary file 2 [file 7dac6e2c18fb53a1a23b539c.docx]

**Distinct immune and genomic signatures predict resistance to ibrutinib therapy in Waldenström macroglobulinemia**

Tina Bagratuni1*, Christos Vlachos1*, Maria Sakkou1, Ioannis Kollias1, Ourania Theologi1, Nefeli Mavrianou-Koutsoukou1, Christine Liacos1, Konstantina Taouxi1, Alexandra Papadimou1, Katerina Chrisostomidou1, Agisilaos Papadopoulos1, Eleni Kalafati1, Foteini Theodorakakou1, Maria Gavriatopoulou1, Evangelos Terpos1, Zachary R. Hunter2, Steven Treon2, Meletios A. Dimopoulos1**, Efstathios Kastritis1**

**Supplemental Figure Legends**

**Suppl. Figure 1.** Kaplan-Meier curves of clinical and genomic features. **A.** Low levels of Albumin and **B.** high levels of serum IgM are associated with shorter PFS. **C.** *MYD88WT* and **D.** *CXCR4MUT* patients have shorter PFS.

**Suppl. Figure 2. A.** Stacked bar plot, displaying the cell type composition across samples. **B.** Boxplots of normalized cell-type contribution per sample for the RG cohort, between T1 and T2. **C.** Boxplots of normalized cell-type contribution per sample for the NRG cohort, between T1 and T2.

**Suppl. Figure 3. A.** Boxplots of normalized counts of monocytic cell sub-clusters after integration with the reference. **B.** Activity score of the BIOCARTA inflammation pathway grouped by response status and timepoint. **C.** Boxplots of normalized counts of neutrophil cell sub-clusters after integration with the reference. **D.** UMAP and subclustering of the cells annotated as neutrophils. **E.** Feature plot of expression of selected genes characteristic of the neutrophil sub-clusters.

**Suppl. Figure 4.** **A.** Boxplots of normalized counts of T-cell sub-clusters after integration with the reference including the population of INF-activated T-cells. **B.** Sub-clustering of cytotoxic GZMB+ and GZMK+ T-cells. Cluster 8 was characterized by high expression of genes such as LAG3, TIGIT,PDCD1 which are markers of T-cell exhaustion. **C.** Boxplots of normalized counts per sample for the C8 after integration with the reference. **D.** Exhaustion score estimated per cell using the exhaustion marker genes CTLA4, PDCD1, LAG3, TIGIT, PD1 and HAVCR2. Cells are grouped across response groups and timepoints.

**Suppl. Figure 5. A.** UMAP visualizations of B cells colored by sample of origin. **B.** Stacked bar plot showing the contribution of B-cell subtypes across response groups and timepoints. **C.** BMI is positively correlated with the number of B-cells per patient. **D.** Box plots showing the normalized B-cell counts per sample grouped by mutation status (*MYD88 MUT/WT*, *CXCR4 MUT/WT***). E.** Violin plots of the expression levels of genes up-regulated at T1, compared to T2. **F.** Volcano-plots of DEGs between T1 and T2 in the NRG and RG cohorts of patients. **G.** Activity score of the BIOCARTA IL6 pathway estimated per cell. Cells are then grouped based on the response group and collection timepoint.

**Suppl. Figure 6.** Barplots of PC/MBC like scores estimated for each sample at T1. Samples with higher scores are annotated as PC-like.

**Suppl. Figure 7. A.** AUCell scores of the top-30 genes associated with GEX1-4, grouped by the MYD88/CXCR4 mutational profile. **B.** Significant pathways over-represented in each GEX. **C.** Gene expression heatmap of three gene expression signatures (GEX1-GEX3) grouped according to MYD88 and CXCR4 mutation status of the validation cohort. **D.** PFS according to GEX1,2 and GEX3 scores in the validation cohort.

**Suppl. Figure 8. A.** Oncoplot of most common SNVs/INDELs identified in PC-like (up) and MBC-like (bottom) samples. **B.** Clonal evolution of WM patients that did not show branching evolution. On the y-axis the number of SNVs accumulated across time is shown.

**Suppl. Figure 9.** Heatmap of difference in the interaction weight between RG and NRG at T1 across all the cell-types found in the microenvironment of the clonal B-cells. Red indicates increased interaction weight in the NRG and blue increased interaction weight in the RG. **B.** Same as A. for T2.

**Suppl. Figure 10.** Schematic overview summarizing the key cellular immune subtypes intrinsic and tumor signaling pathways associated with ibrutinib response and clinical outcome in WM patients. Created with Biorender.com
